# Supplementary material for: Thiazolium-functionalized polystyrene monolithic microreactors for continuous-flow umpolung catalysis
Source: Royal Society of Chemistry journal article supplement (doi:10.1039/c3gc41284a), 2013-01-01

## Thiazolium-Functionalized Polystyrene Monolithic Microreactors for Continuous-Flow Umpolung Catalysis

Olga Bortolini,<sup>a</sup> Alberto Cavazzini,<sup>a</sup> Paolo Dambruoso,<sup>\*b</sup> Pier Paolo Giovannini,<sup>a</sup> Lorenzo Caciolli,<sup>a</sup> Alessandro Massi,<sup>\*a</sup> Salvatore Pacifico,<sup>a</sup> and Daniele Ragno<sup>a</sup>

<sup>a</sup>*Dipartimento di Scienze Chimiche e Farmaceutiche, Università di Ferrara, Via Fossato di Mortara 17-27, I-44121 Ferrara (Italy)*

<sup>b</sup>*ISOF-CNR, Area della Ricerca di Bologna, Via P. Gobetti 101, I-40129 Bologna (Italy)*

[alessandro.massi@unife.it](mailto:alessandro.massi@unife.it) - [paolo.dambruoso@isof.cnr.it](mailto:paolo.dambruoso@isof.cnr.it)

### Electronic supplementary information

#### Table of content:

|                                                                                |    |
|--------------------------------------------------------------------------------|----|
| <sup>1</sup> H and <sup>13</sup> C NMR of new compounds <b>2</b> , <b>4a,b</b> | S2 |
| FT-IR spectra of <b>S7a,b</b> and <b>M9a,b</b>                                 | S8 |

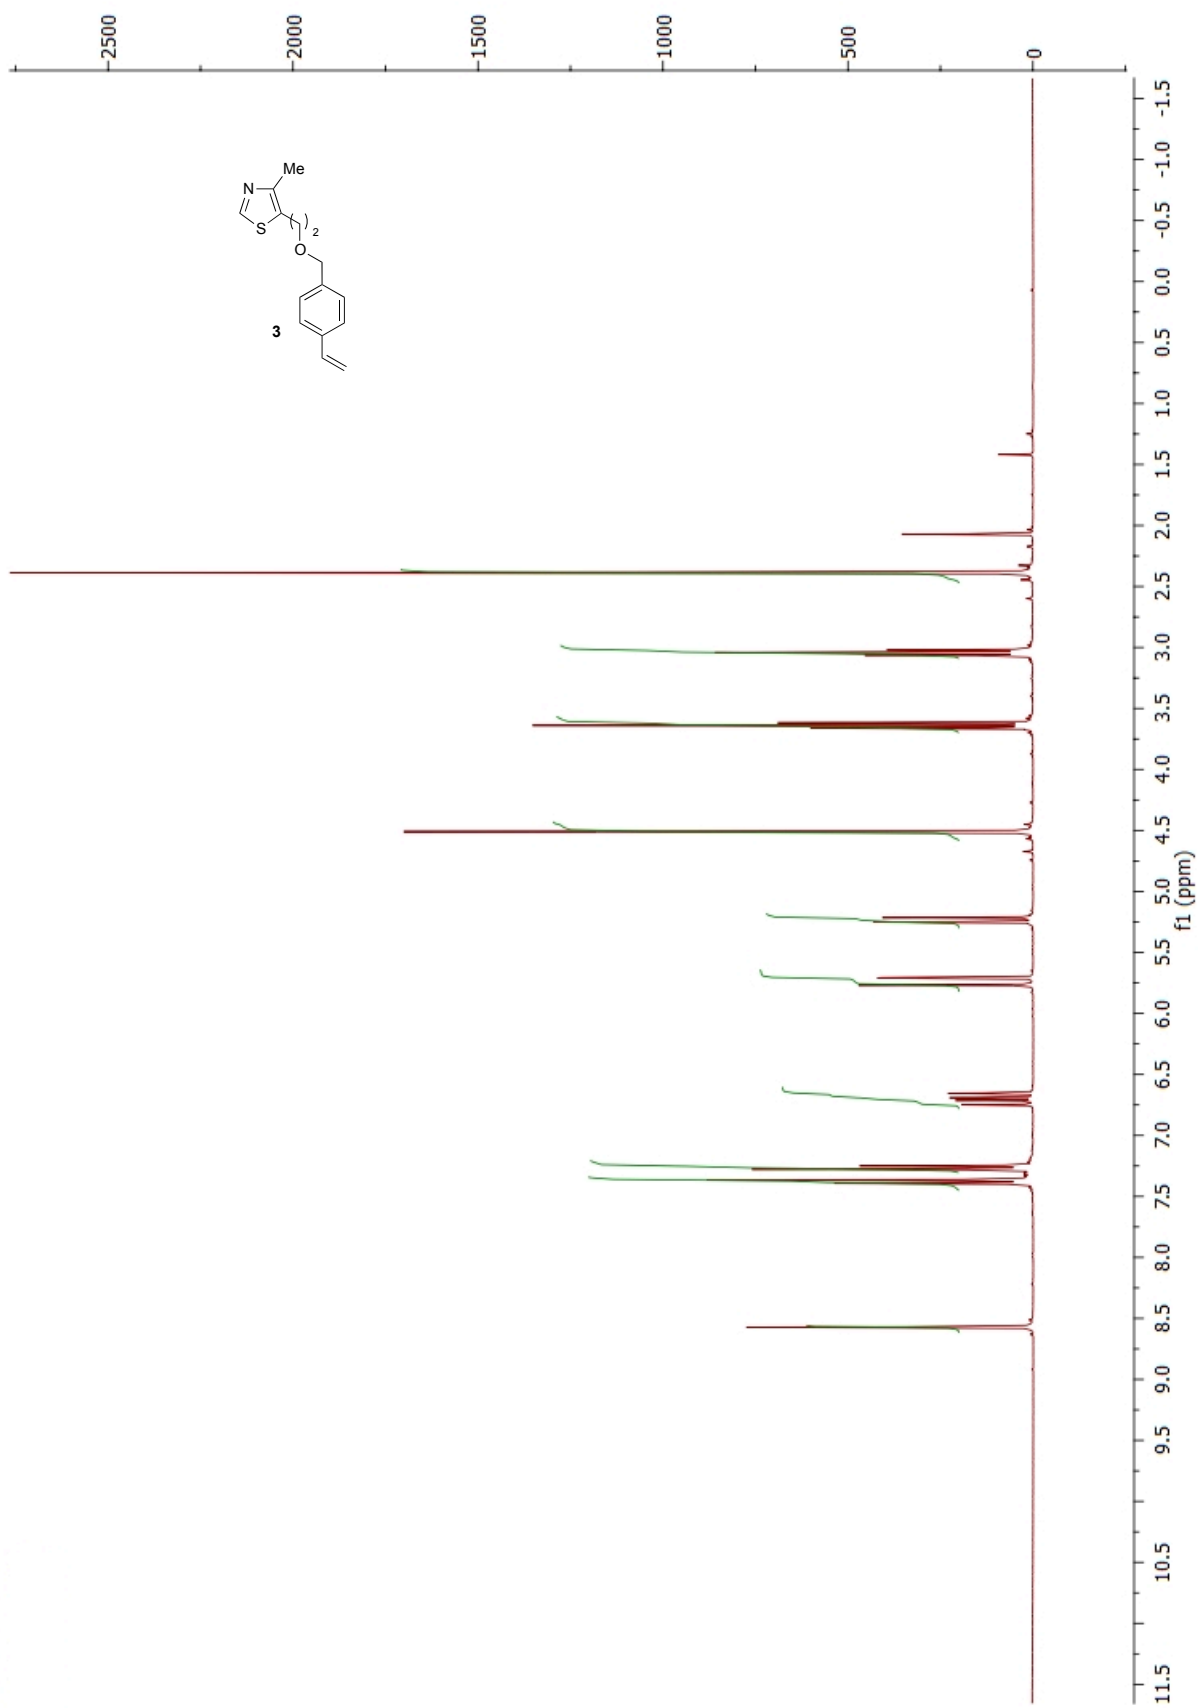

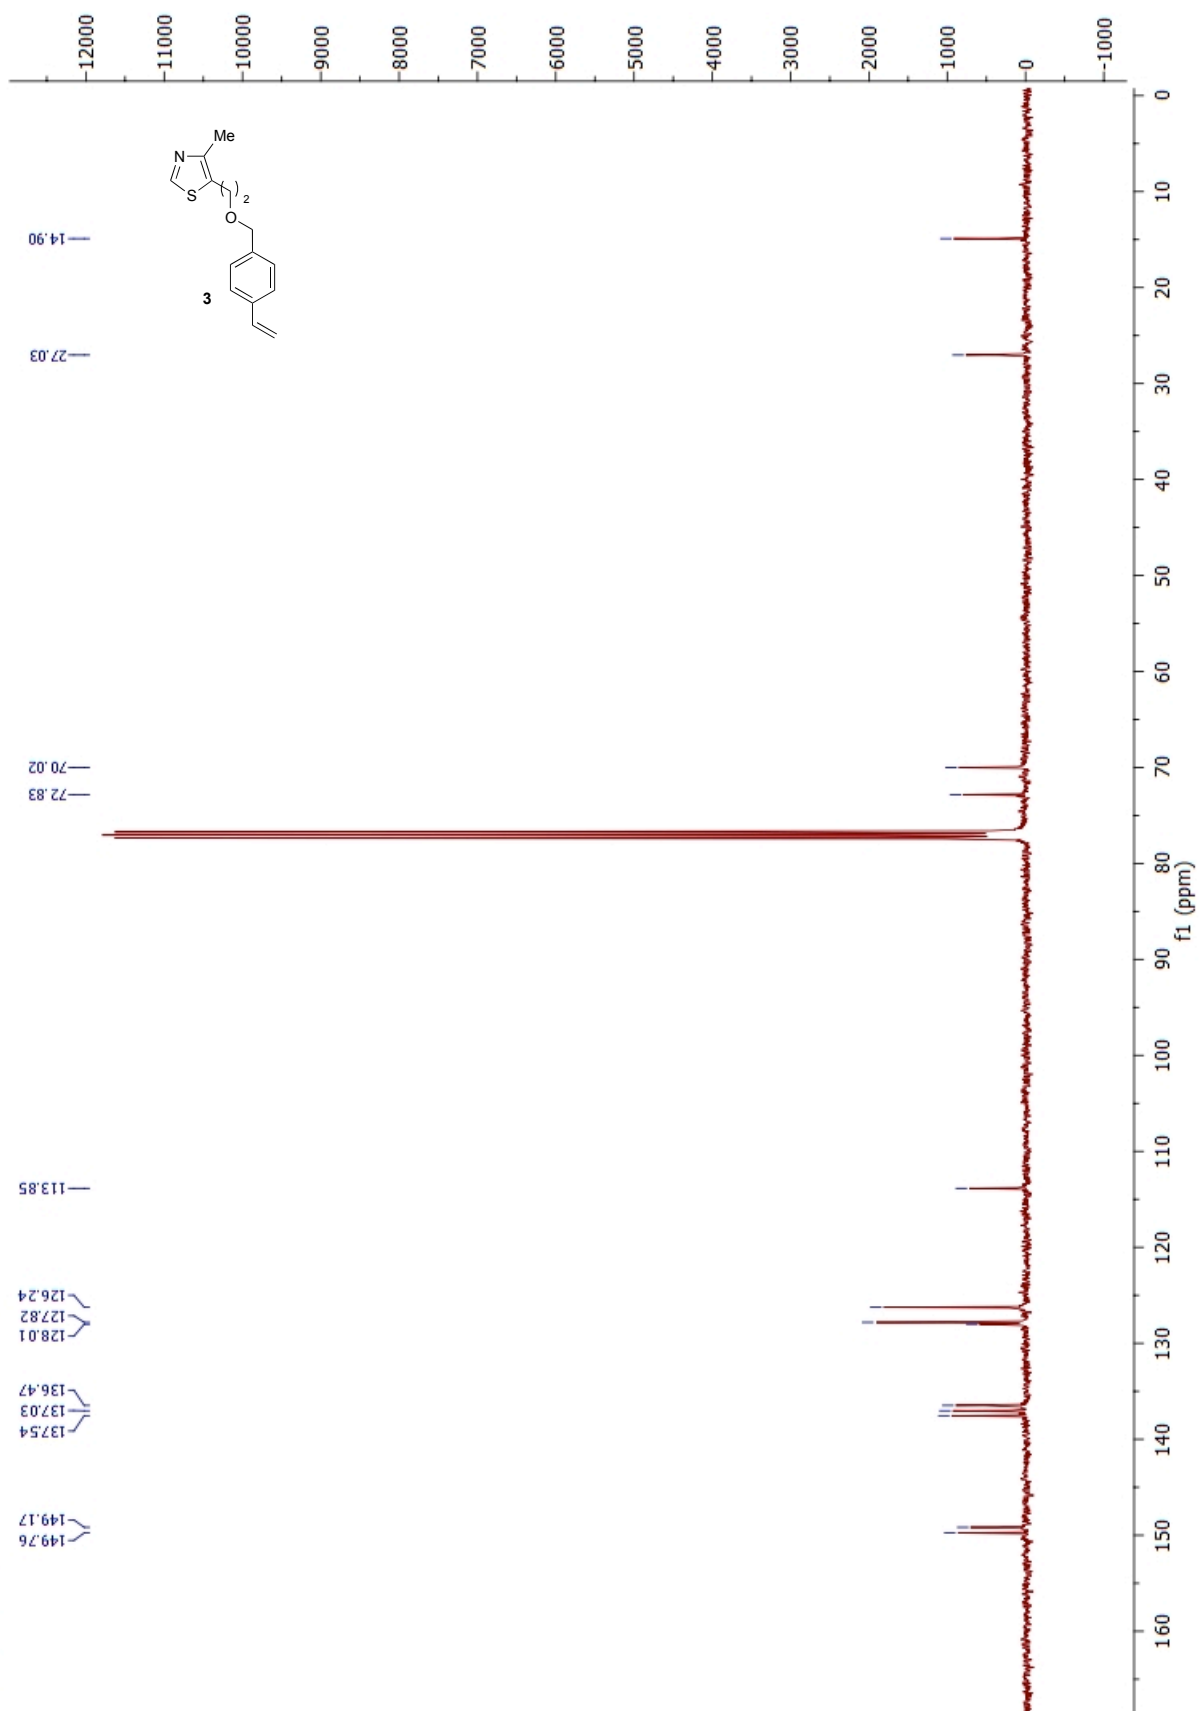

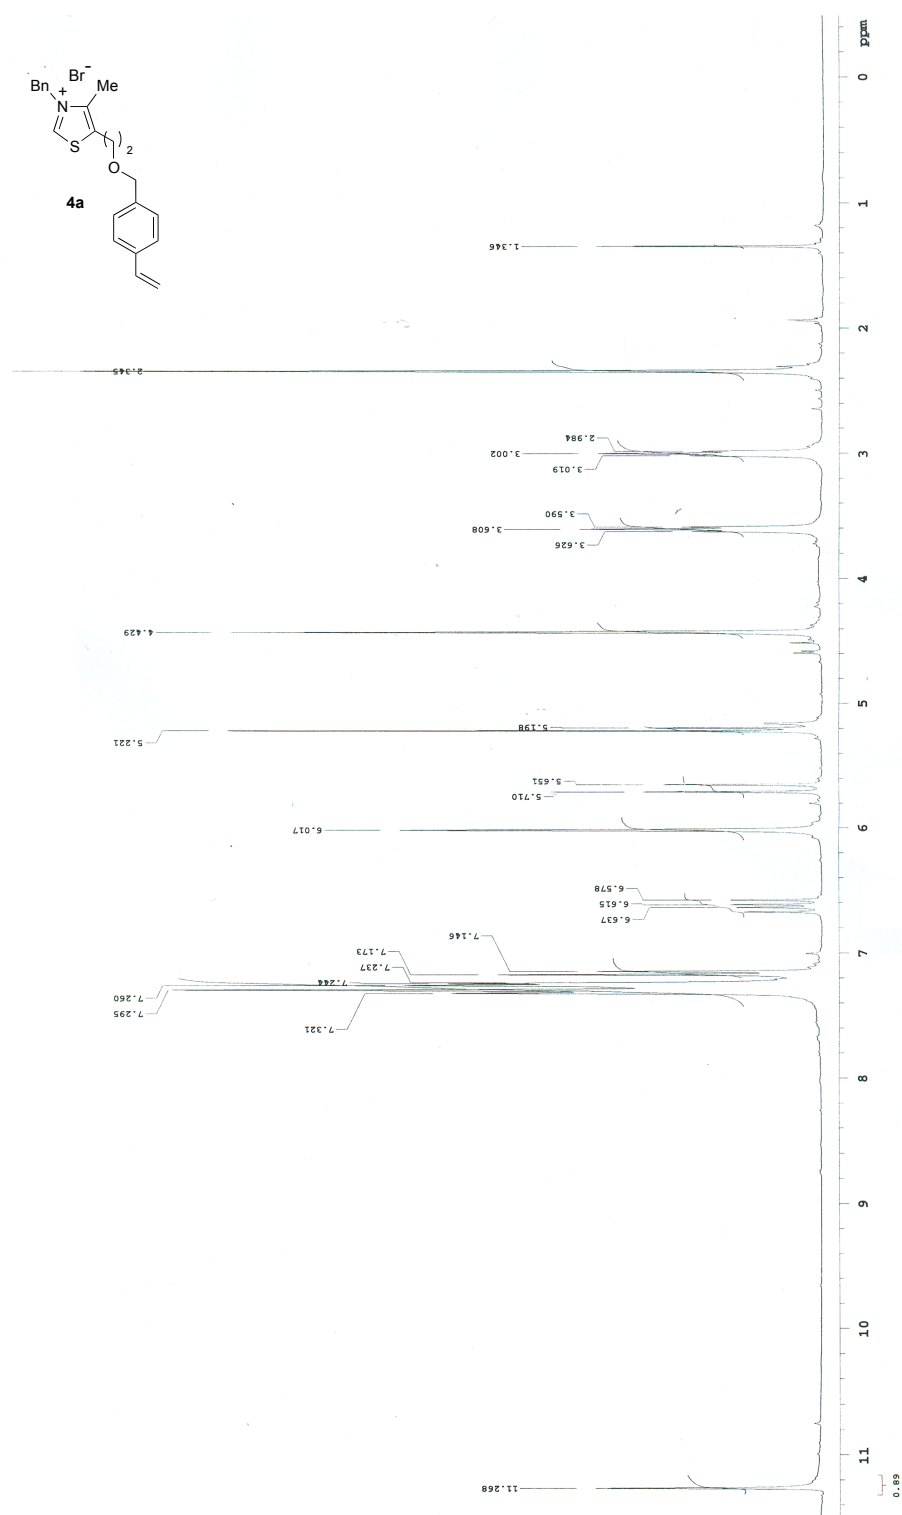

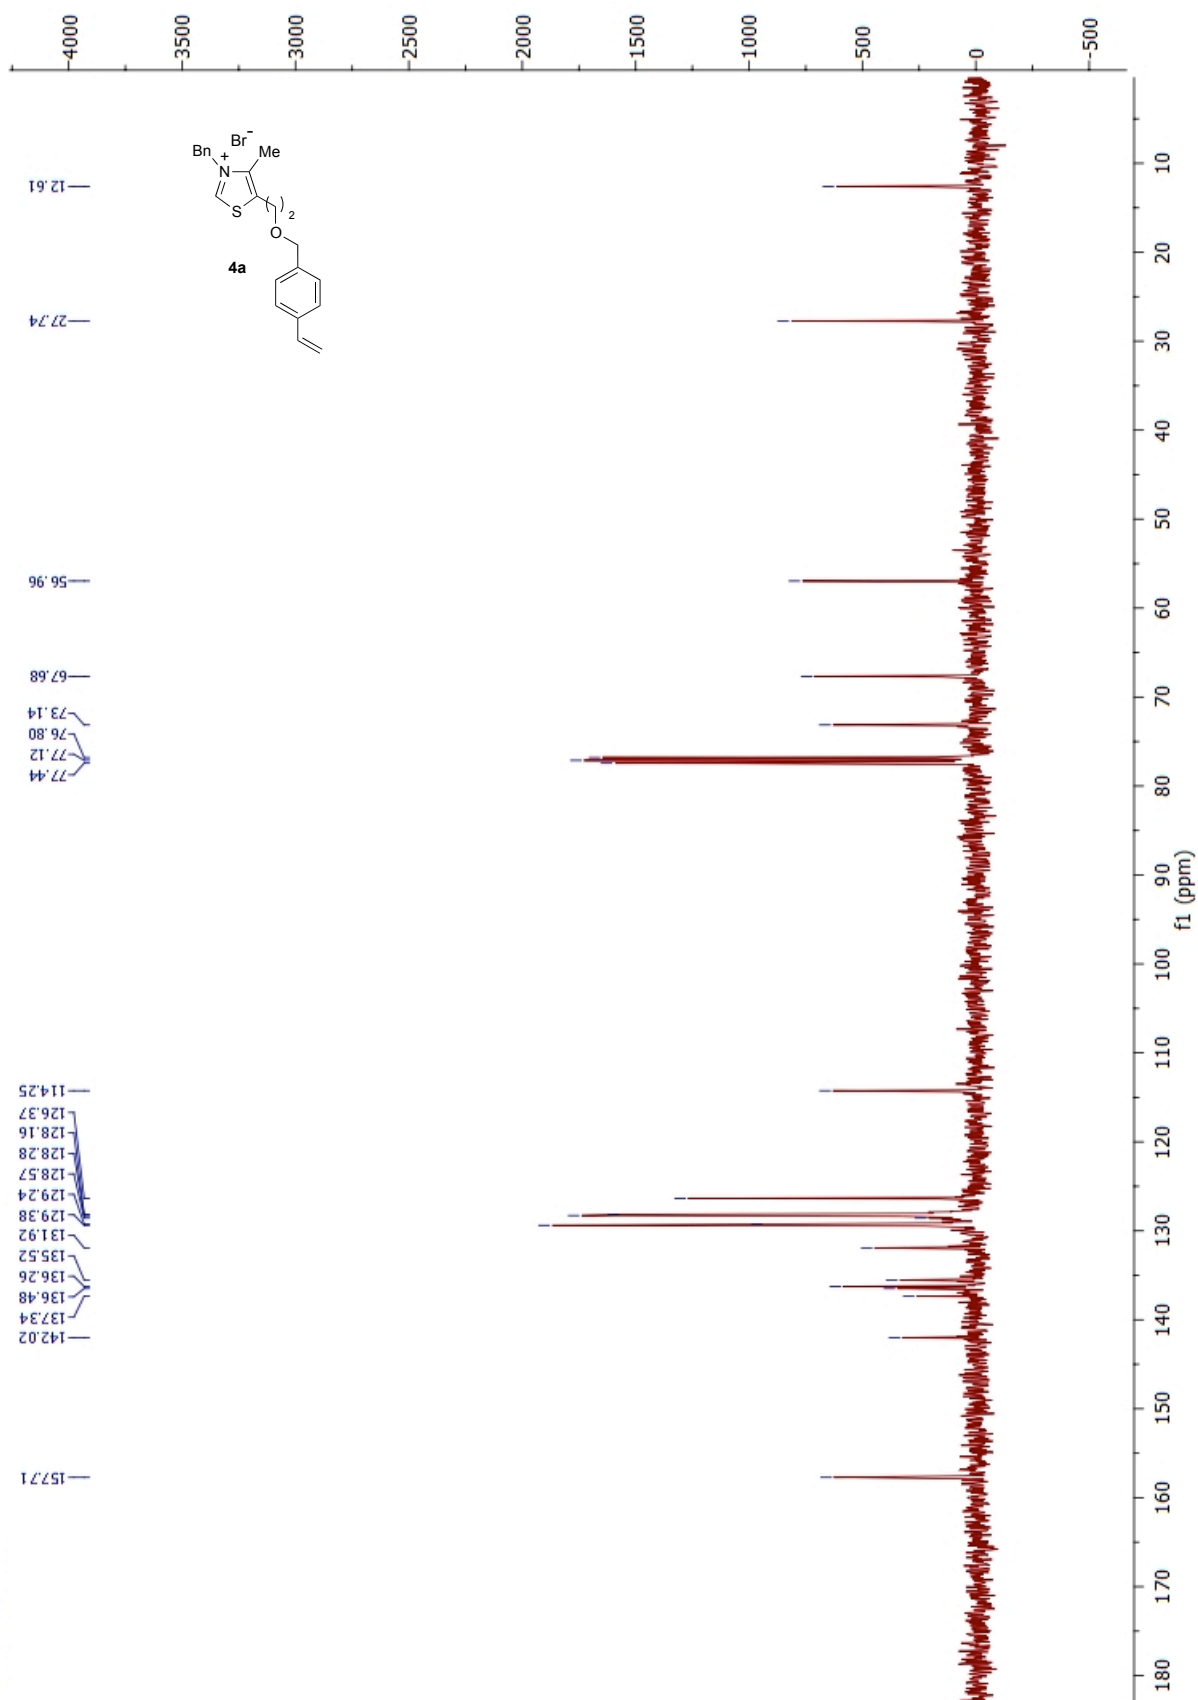

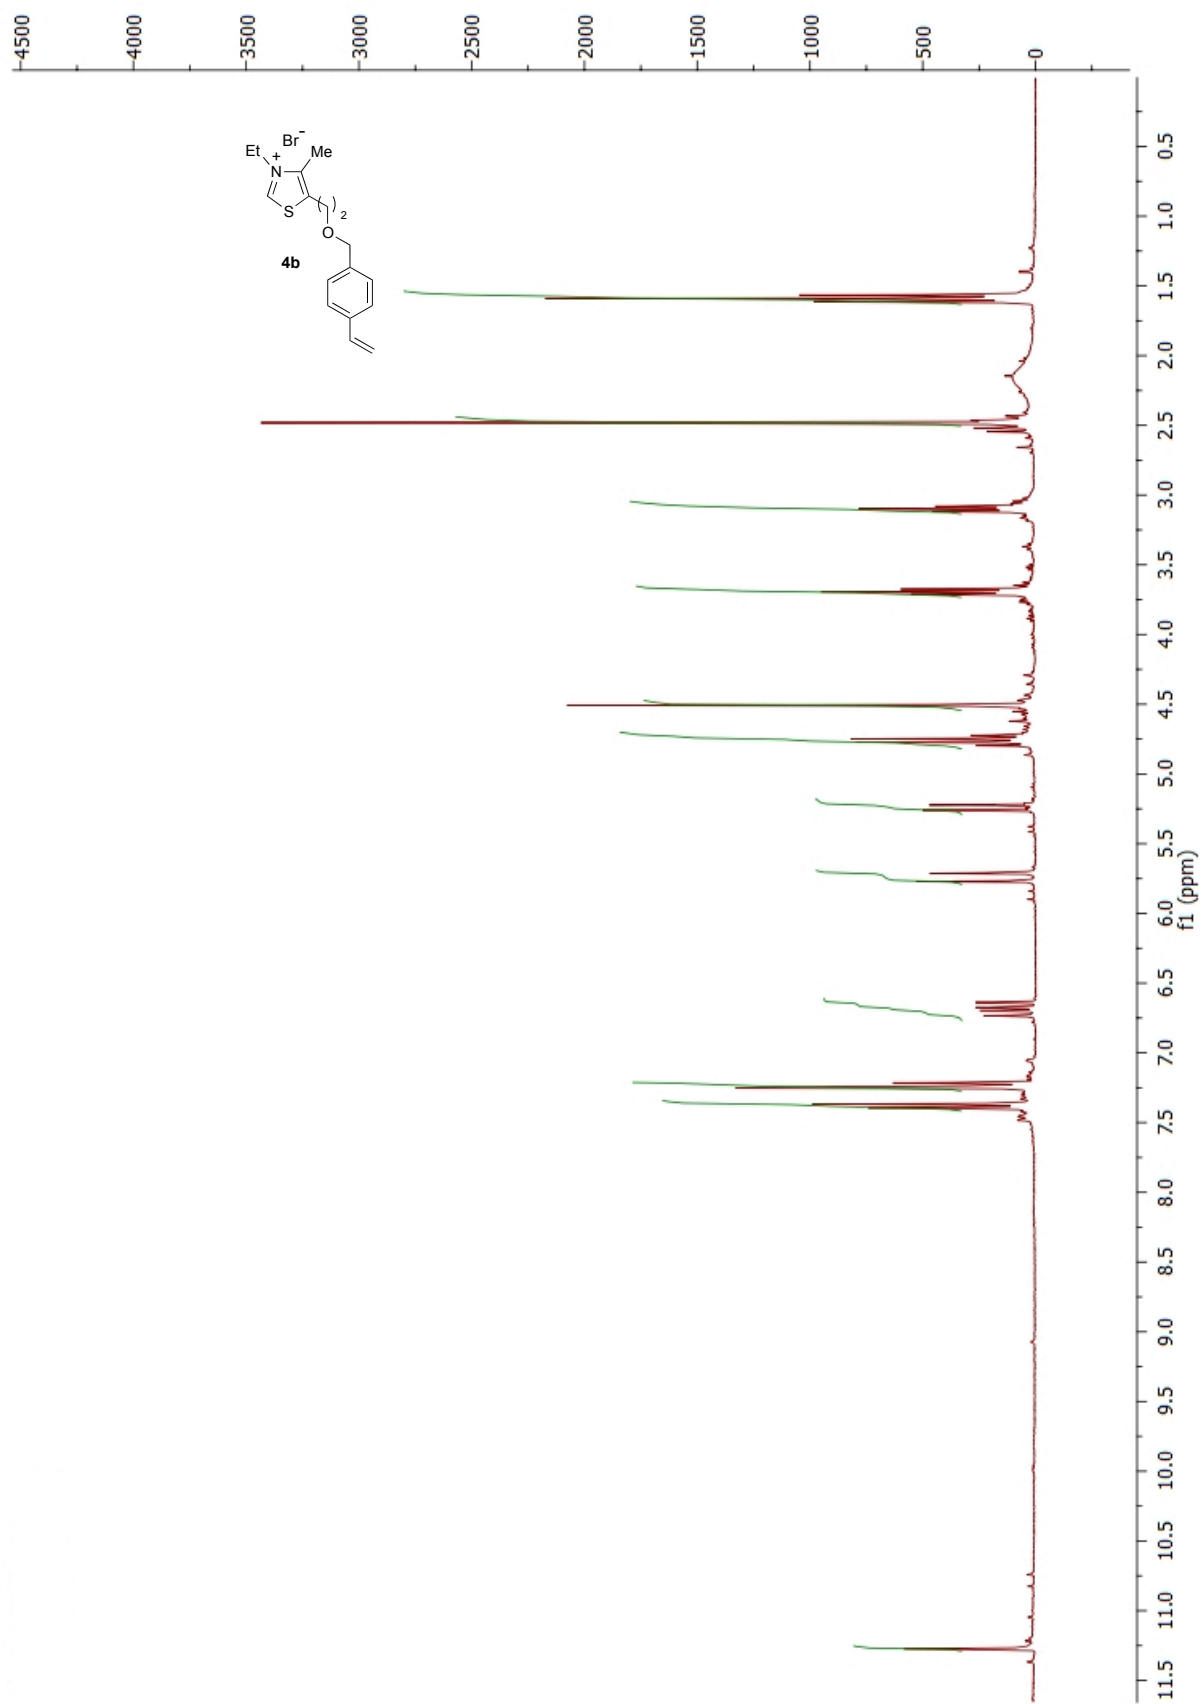

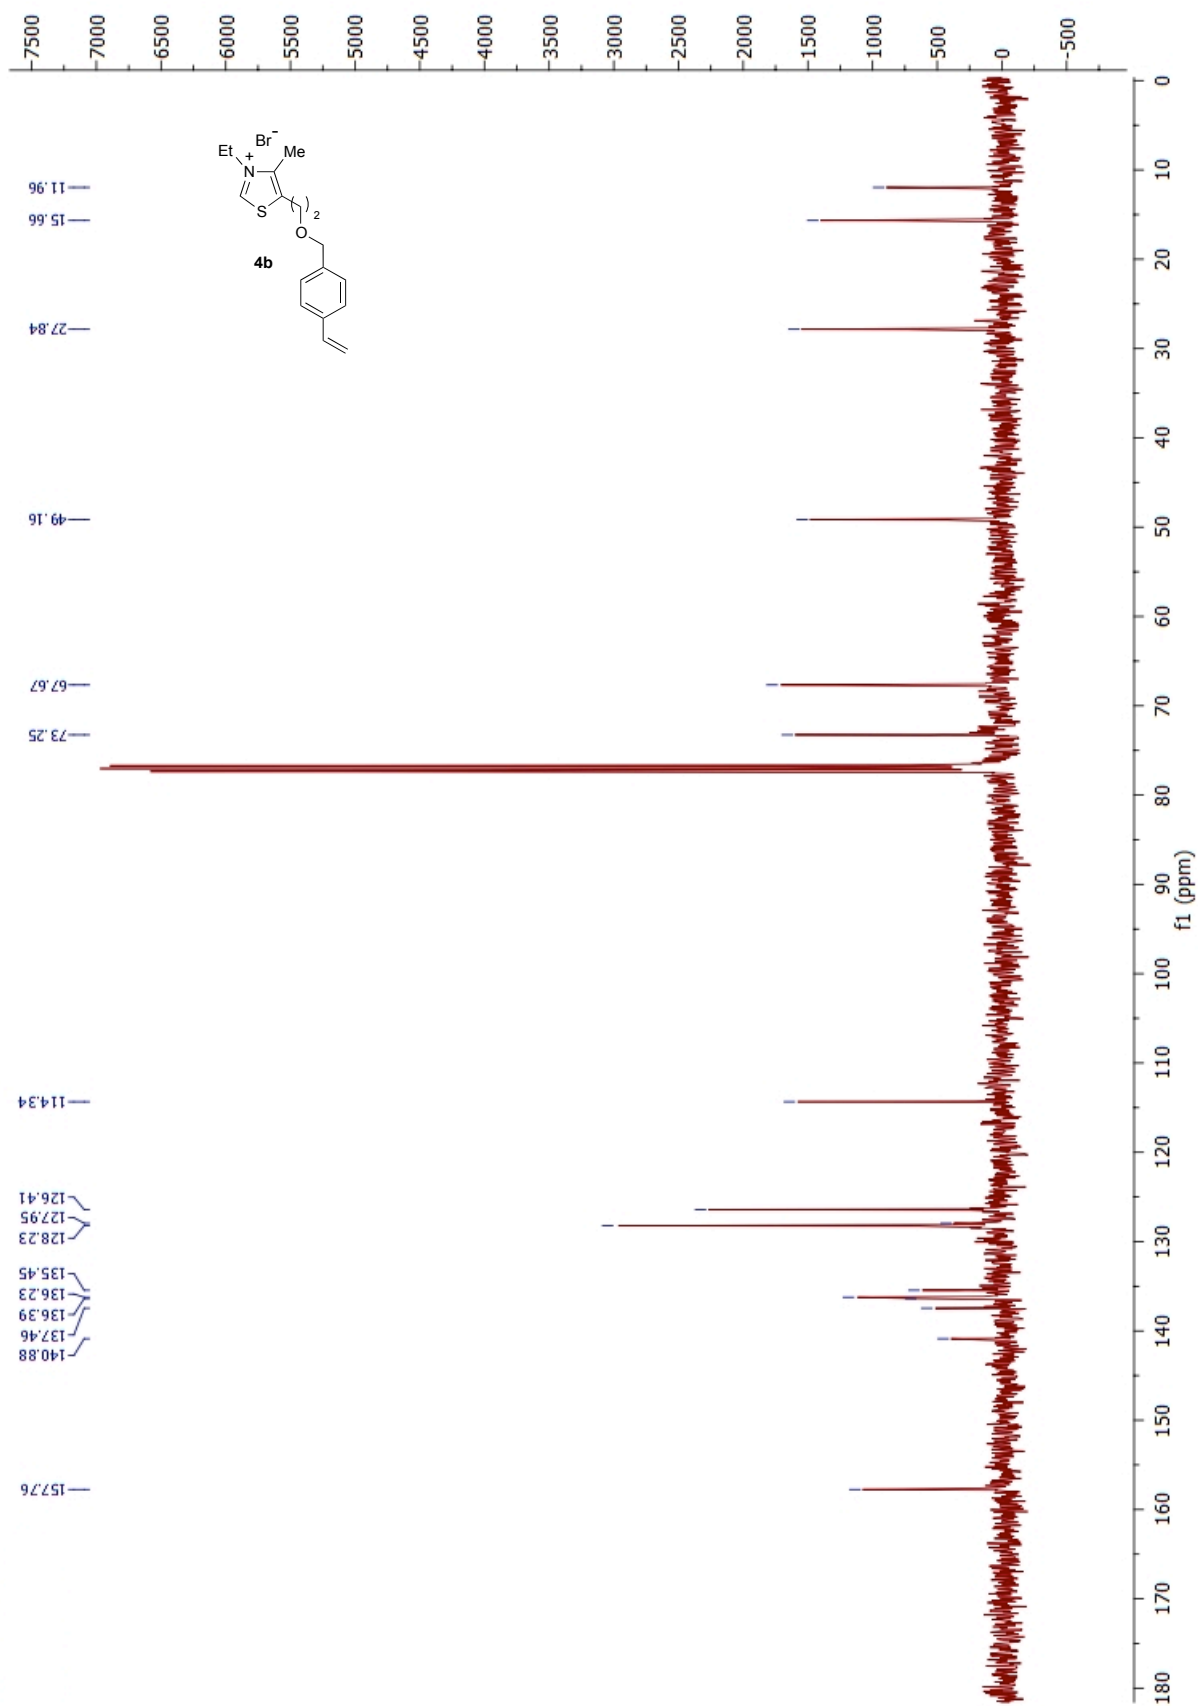

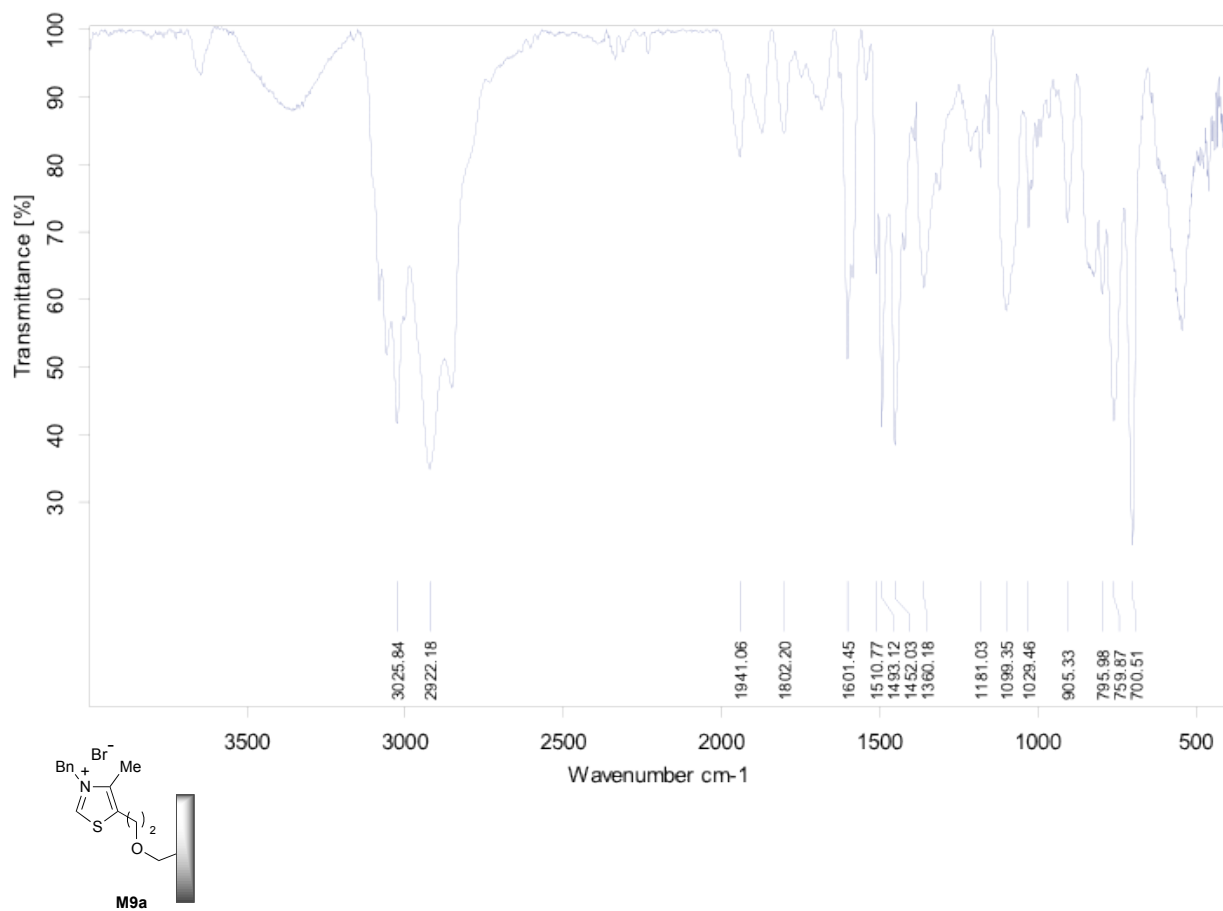



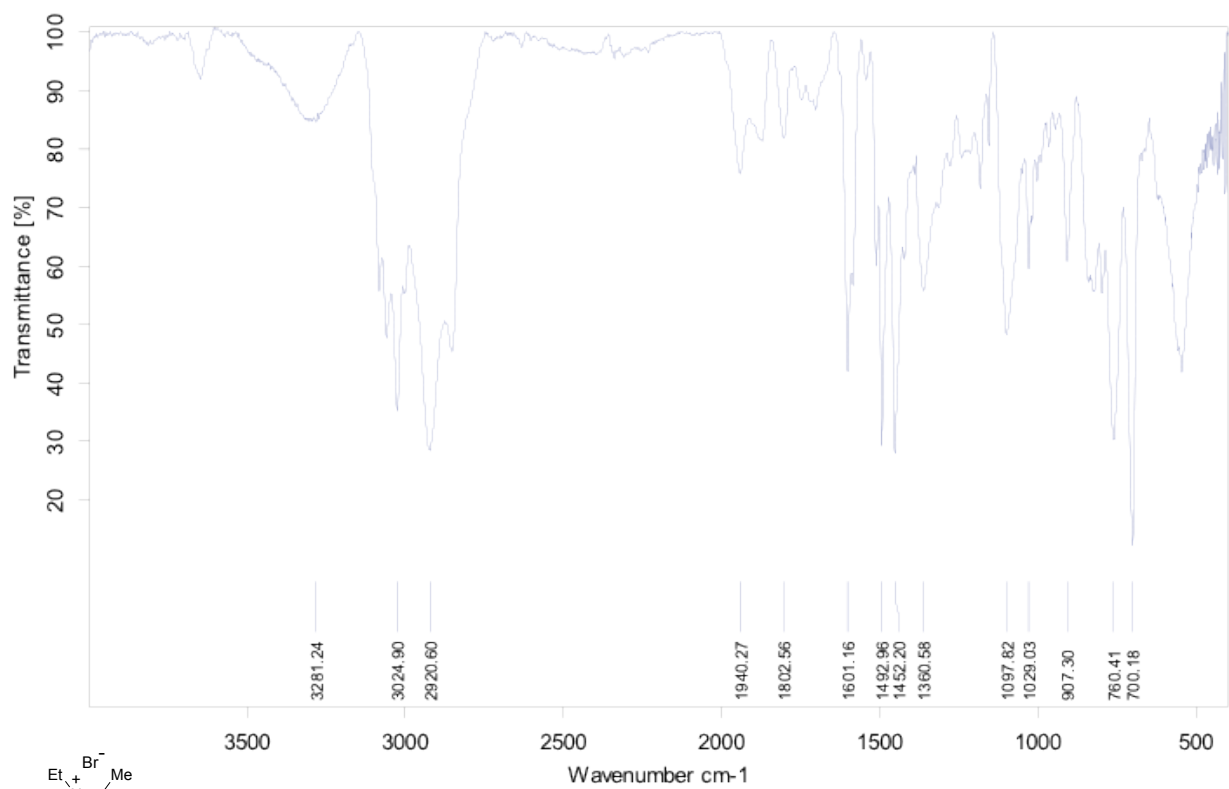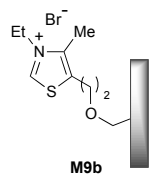

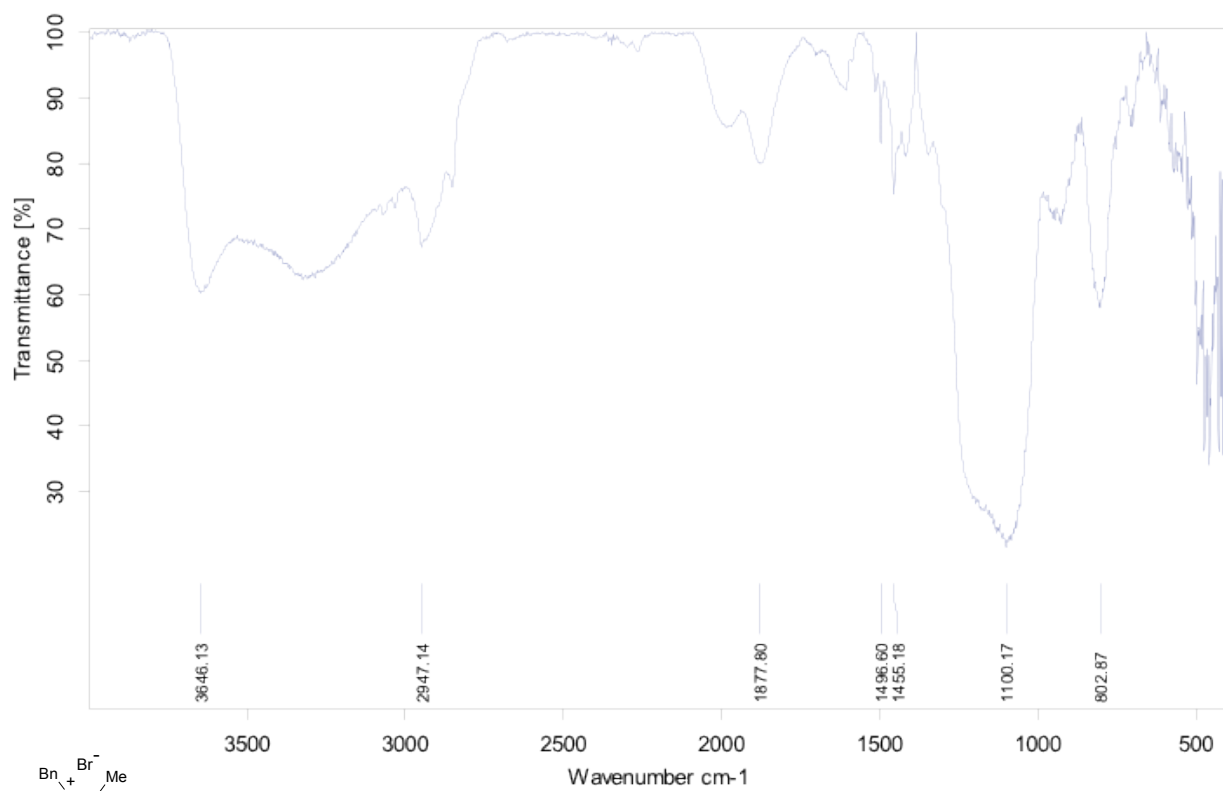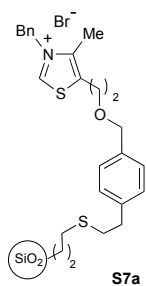

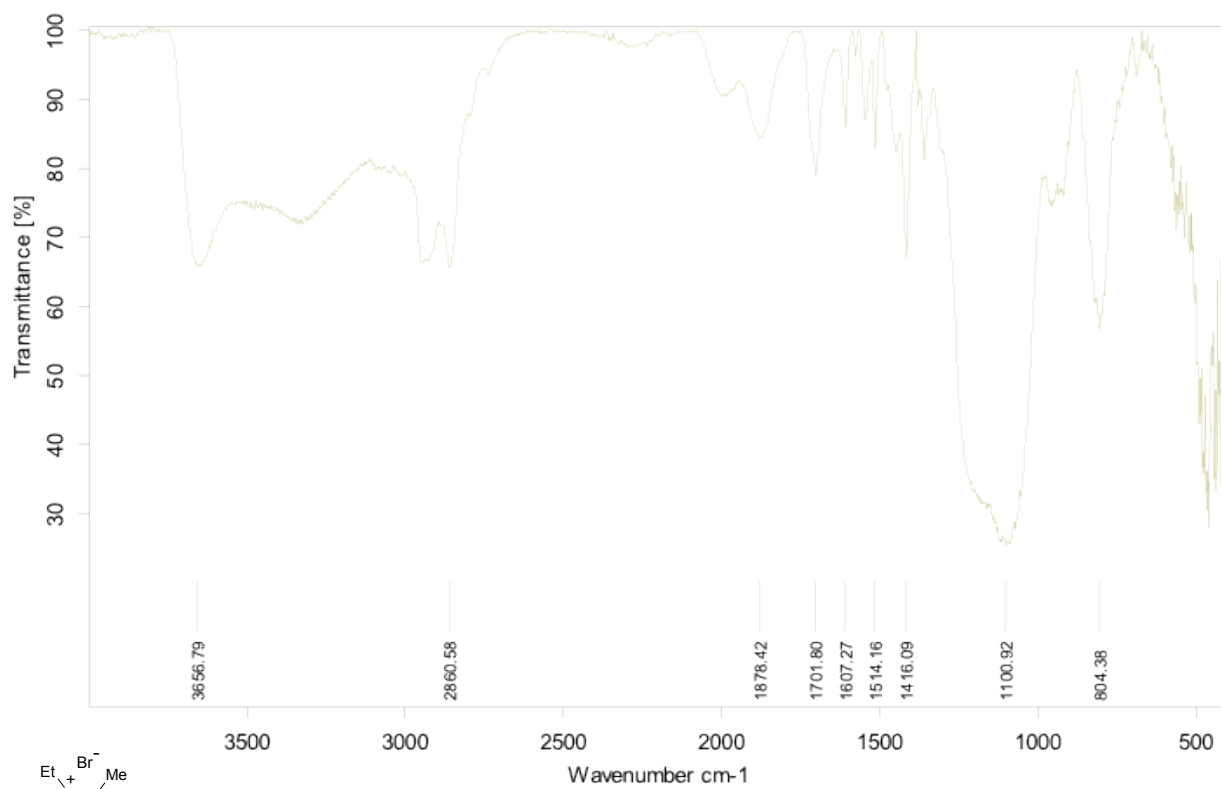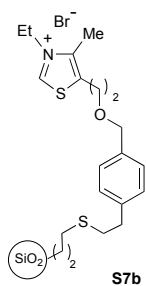

Supplement: c3gc41284a.pdf [file c3gc41284a.pdf]
